# Supplementary material for: Discerning the Complexity of Community Interactions Using a Drosophila Model of Polymicrobial Infections
Source: PubMed Central journal article supplement (PMC2566602; doi:10.1371/journal.ppat.1000184), 2008-10-24
Supplement: ppat.1000184.s004.pdf [file ppat.1000184.s004.pdf]

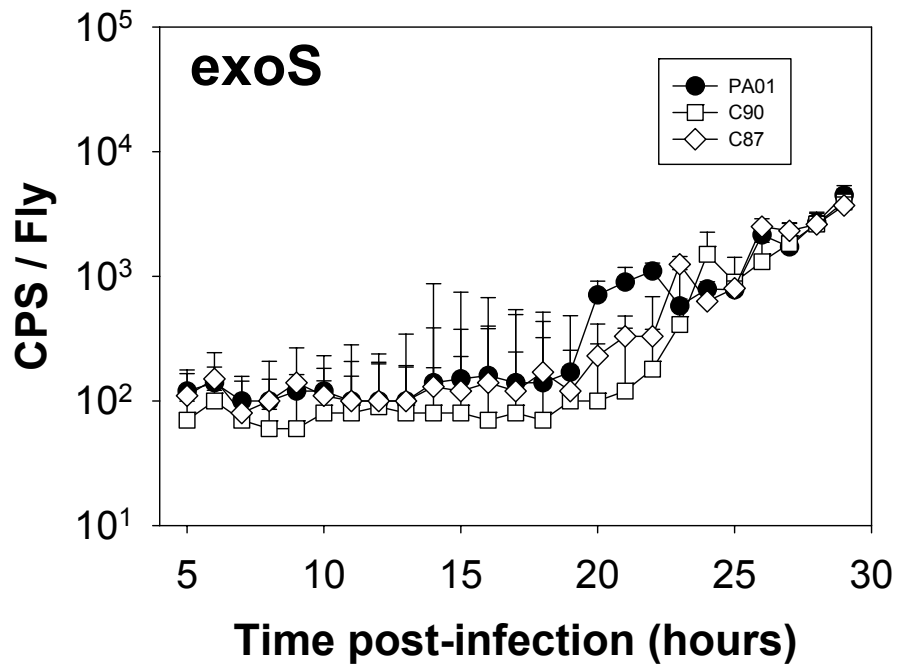

**Figure S2.** An example of a *P. aeruginosa* promoter unaffected in OF co-infections. The activity of the *P. aeruginosa* *exoS* promoter was measured every hour for 30 hours (in live flies). Expression levels are not significantly different between animals infected with *P. aeruginosa* alone (black circles) or co-infected with *P. aeruginosa* and an OF organism; C90 (open squares) or C87 (open diamonds).
